# Supplementary material
Source: PubMed Central journal article supplement (PMC4869688)
Supplement: NIHMS780585-supplement-Supplemental_Data.pdf [file NIHMS780585-supplement-Supplemental_Data.pdf]

## **An Orthogonal Array Optimization of Lipid-like Nanoparticles for mRNA Delivery in Vivo**

Bin Li,<sup>†</sup> Xiao Luo,<sup>†</sup> Binbin Deng,<sup>‡</sup> Junfeng Wang,<sup>†</sup> David W. McComb,<sup>‡</sup> Yimin Shi,<sup>§</sup> Karin M.L.

Gaensler,<sup>§</sup> Xu Tan,<sup>||</sup> Amy L. Dunn,<sup>⊥,#</sup> Bryce A. Kerlin,<sup>⊥,#,▽</sup> and Yizhou Dong<sup>\*,†</sup>

<sup>†</sup>Division of Pharmaceutics & Pharmaceutical Chemistry, College of Pharmacy, The Ohio State University, Columbus, Ohio 43210, United States.

<sup>‡</sup>Center for Electron Microscopy and Analysis, Department of Materials Science and Engineering, The Ohio State University, Columbus, Ohio 43212, United States.

<sup>§</sup>Department of Medicine, University of California-San Francisco, San Francisco, California 94143, United States.

<sup>||</sup>Tsinghua-Peking Center for Life Sciences, School of Medicine, Tsinghua University, Beijing 100084, China.

<sup>⊥</sup>Division of Hematology/Oncology/BMT, Nationwide Children's Hospital, Columbus, Ohio 43205, United States.

<sup>#</sup>Department of Pediatrics, College of Medicine, The Ohio State University, Columbus, Ohio 43205, United States.

<sup>▽</sup>Center for Clinical and Translational Research, The Research Institute at Nationwide Children's, Columbus, Ohio 43205, United States.

**\*Corresponding Author**

E-mail: dong.525@osu.edu.

### General synthetic procedures and spectral data:

*Synthesis of compound 3.* To a solution of diamine (75 mmol) in  $\text{CHCl}_3$  (70 mL) was added a solution of  $\text{Boc}_2\text{O}$  (14.4 mmol) in  $\text{CHCl}_3$  (30 mL) via an additional funnel over 2.5 h. The resulting suspension was stirred and 100 mL of  $\text{NaHCO}_3$  (1N) was slowly added to form a bi-layer solution. The organic layer was washed with 100 mL of 1N  $\text{NaHCO}_3$  and 20 mL of brine, and then dried over solid  $\text{MgSO}_4$  for 2 h. The solution was then filtered, evaporated and dried under high vacuum in order to afford compound **3**. Yield: n=2, 91%; n=3, commercially available reagent; n=4, 63%; n=5, 95%; n=6, commercially available reagent; n=7, 95%; n=8, 86%.

*Synthesis of compound 4.*<sup>1</sup> To a solution of compound **2** (1.88 mmol) in  $\text{CH}_2\text{Cl}_2$  (30 mL) was added 10 mL of pyridine and cooled in an ice bath. A solution of compound **3** (7.52 mmol) in  $\text{CH}_2\text{Cl}_2$  (30 mL) was added dropwise with stirring. The reaction mixture was then allowed to warm to RT, diluted with 100 mL of  $\text{CH}_2\text{Cl}_2$  and washed twice with 50 mL of water, 50 mL of saturated  $\text{NaHCO}_3$ , and 50 mL of brine. The solution was dried over solid  $\text{MgSO}_4$  for 2 h and concentrated. The residue was purified by column chromatography using a CombiFlash Rf system with a RediSep Gold Resolution silica column (Teledyne Isco) with gradient elution from 100%  $\text{CH}_2\text{Cl}_2$  to  $\text{CH}_2\text{Cl}_2/\text{MeOH}/\text{NH}_4\text{OH}$  (75/22/3 by volume) to give compound **4**. Yield: n=2, 74%; n=3, 68%; n=4, 65%; n=5, 69%; n=6, 81%; n=7, 37%; n=8, 61%.

*Synthesis of compound 1.* To a suspension of compound **4** (1.41 mmol) in  $\text{CH}_2\text{Cl}_2$  (20 mL) was added trifluoroacetic acid (TFA, 1.41 mmol). The mixture was stirred at RT for 1 h and monitored with thin layer chromatography (TLC). Upon completion of the reaction, the solvent was evaporated and the residue was dissolved in MeOH and concentrated. After solidification in EtOAc, compound **1** was dried under an oil pump and afforded in quantitative yield.

<sup>1</sup>H NMR spectra were recorded at 300 or 400 MHz on the Bruker instrument. <sup>1</sup>H NMR chemical shifts were reported as  $\delta$  values in ppm relative to TMS. Mass spectra were obtained on a Micromass Q-TOF micro Mass Spectrometer.

*N*<sup>1</sup>,*N*<sup>3</sup>,*N*<sup>5</sup>-tris(2-(didodecylamino)ethyl)benzene-1,3,5-tricarboxamide (**TT2**): yield (82%). <sup>1</sup>H NMR (300 MHz, CDCl<sub>3</sub>,  $\delta$ ) 8.88 (3H, br), 8.56 (3H, s), 3.81 (6H, m), 3.32 (6H, m), 3.04-3.08 (12H, m), 1.69 (12H, s), 1.20-1.30 (108H, m), 0.88 (18H, tri, *J* = 6.9 Hz). MS (*m/z*): [M + H]<sup>+</sup> calcd. for C<sub>87</sub>H<sub>169</sub>N<sub>6</sub>O<sub>3</sub>, 1346; found, 1346.

*N*<sup>1</sup>,*N*<sup>3</sup>,*N*<sup>5</sup>-tris(3-(didodecylamino)propyl)benzene-1,3,5-tricarboxamide (**TT3**): yield (50%). <sup>1</sup>H NMR (300 MHz, CDCl<sub>3</sub>,  $\delta$ ) 8.53 (3H, br), 8.40 (3H, s), 3.57 (6H, m), 2.67-3.60 (6H, tri, *J* = 5.4 Hz), 2.58-2.48 (12H, tri, *J* = 7.5 Hz), 1.90-1.70 (12H, m), 1.57-1.38 (12H, m), 1.35-1.17 (96H, m), 0.89 (18H, tri, *J* = 6.9 Hz). MS (*m/z*): [M + H]<sup>+</sup> calcd. for C<sub>90</sub>H<sub>175</sub>N<sub>6</sub>O<sub>3</sub>, 1388; found, 1388.

*N*<sup>1</sup>,*N*<sup>3</sup>,*N*<sup>5</sup>-tris(4-(didodecylamino)butyl)benzene-1,3,5-tricarboxamide (**TT4**): yield (31%). <sup>1</sup>H NMR (300 MHz, CDCl<sub>3</sub>,  $\delta$ ) 8.33 (3H, s), 7.39 (3H, br), 3.5-3.42 (6H, m), 2.65-2.46 (18H, m), 1.75-1.55 (12H, m), 1.52-1.37 (12H, m), 1.35-1.17 (102H, m), 0.90 (18H, tri, *J* = 6.9 Hz). MS (*m/z*): [M + H]<sup>+</sup> calcd. for C<sub>93</sub>H<sub>181</sub>N<sub>6</sub>O<sub>3</sub>, 1430; found, 1430.

*N*<sup>1</sup>,*N*<sup>3</sup>,*N*<sup>5</sup>-tris(5-(didodecylamino)pentyl)benzene-1,3,5-tricarboxamide (**TT5**): yield (45%). <sup>1</sup>H NMR (300 MHz, CDCl<sub>3</sub>,  $\delta$ ) 8.40 (3H, s), 6.62 (3H, s), 3.56-3.45 (6H, m), 2.47-2.39 (18H, m), 1.76-1.65 (18H, m), 1.52-1.37 (24H, m), 1.35-1.20 (90H, m), 0.89 (18H, tri, *J* = 6.9 Hz). MS (*m/z*): [M + H]<sup>+</sup> calcd. for C<sub>96</sub>H<sub>187</sub>N<sub>6</sub>O<sub>3</sub>, 1472; found, 1472.

*N*<sup>1</sup>,*N*<sup>3</sup>,*N*<sup>5</sup>-tris(6-(didodecylamino)hexyl)benzene-1,3,5-tricarboxamide (**TT6**): yield (53%). <sup>1</sup>H NMR (300 MHz, CDCl<sub>3</sub>,  $\delta$ ) 8.38 (3H, s), 6.52 (3H, br), 3.52-3.45 (6H, m), 2.47-2.39 (18H, m), 1.72-1.63 (18H, m), 1.54-1.36 (30H, m), 1.32-1.21 (90H, m), 0.90 (18H, tri, *J* = 6.9 Hz). MS (*m/z*): [M

+ H]<sup>+</sup> calcd. for C<sub>99</sub>H<sub>193</sub>N<sub>6</sub>O<sub>3</sub>, 1515; found, 1515.

*N*<sup>1</sup>,*N*<sup>3</sup>,*N*<sup>5</sup>-tris(7-(didodecylamino)heptyl)benzene-1,3,5-tricarboxamide (**TT7**): yield (75%). <sup>1</sup>H NMR (300 MHz, CDCl<sub>3</sub>, δ) 8.40 (3H, s), 6.72 (3H, s), 3.48 (6H, m), 2.50 (18H, m), 1.70-1.56 (6H, m), 1.55-1.34 (30H, m), 1.37-1.27 (108H, m), 0.89 (18H, tri, *J* = 6.9 Hz). MS (*m/z*): [M + H]<sup>+</sup> calcd. for C<sub>102</sub>H<sub>199</sub>N<sub>6</sub>O<sub>3</sub>, 1557; found, 1557.

*N*<sup>1</sup>,*N*<sup>3</sup>,*N*<sup>5</sup>-tris(8-(didodecylamino)octyl)benzene-1,3,5-tricarboxamide (**TT8**): yield (quantitative). <sup>1</sup>H NMR (300 MHz, CDCl<sub>3</sub>, δ) 8.40 (3H, s), 6.86 (3H, br), 3.47 (6H, m), 2.82-2.52 (18H, m), 1.73-1.42 (30H, m), 1.42-1.17 (120H, m), 0.90 (18H, tri, *J* = 6.9 Hz). MS (*m/z*): [M + H]<sup>+</sup> calcd. for C<sub>105</sub>H<sub>205</sub>N<sub>6</sub>O<sub>3</sub>, 1599; found, 1599.

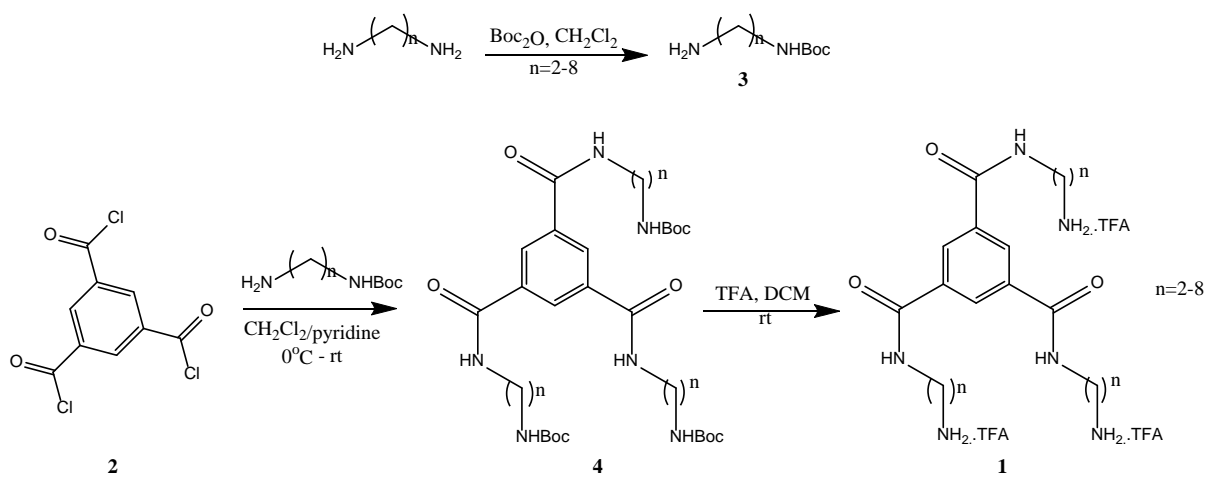

**Figure S1.** The synthetic route to compound **1**. Benzene-1,3,5-tricarbonyl trichloride (**2**) was reacted with Boc-protected diamine (**3**) to produce the intermediates (**4**). Deprotection of **4** gave compound **1**.

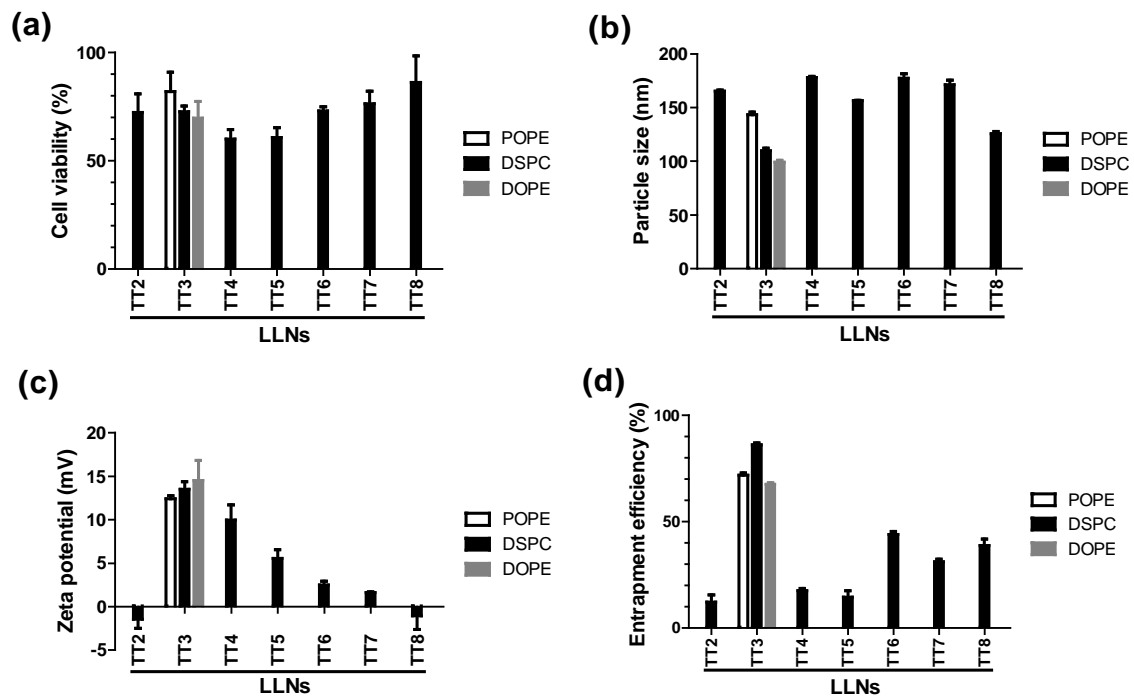

**Figure S2.** The cell viability (a), particle size (b), zeta potential (c), and entrapment efficiency (d) of LLNs.

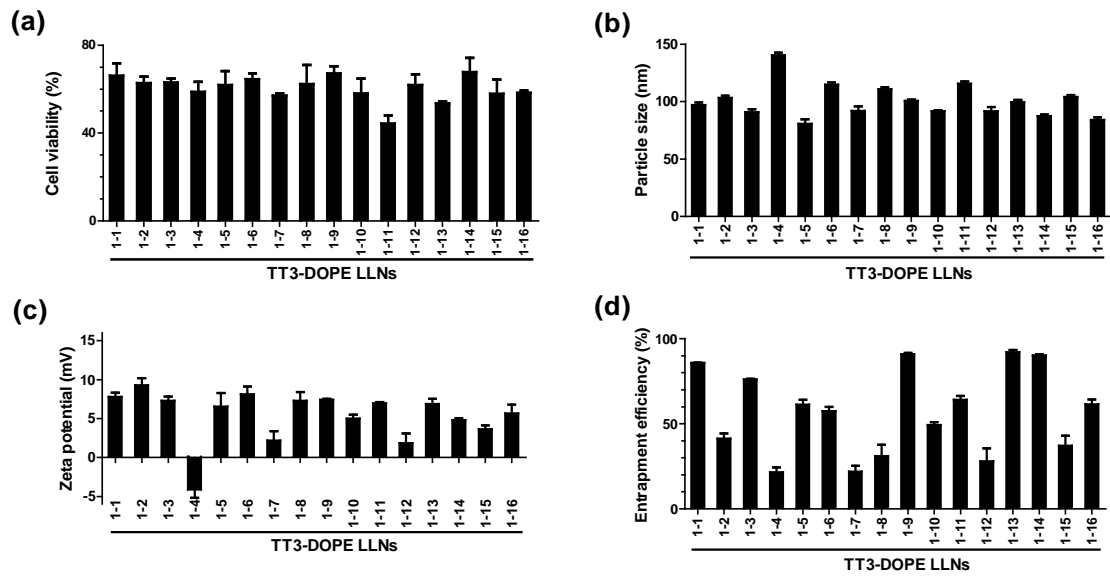

**Figure S3.** The cell viability (a), particle size (b), zeta potential (c), and entrapment efficiency (d) of TT3-DOPE LLNs formulated through the first orthogonal array.

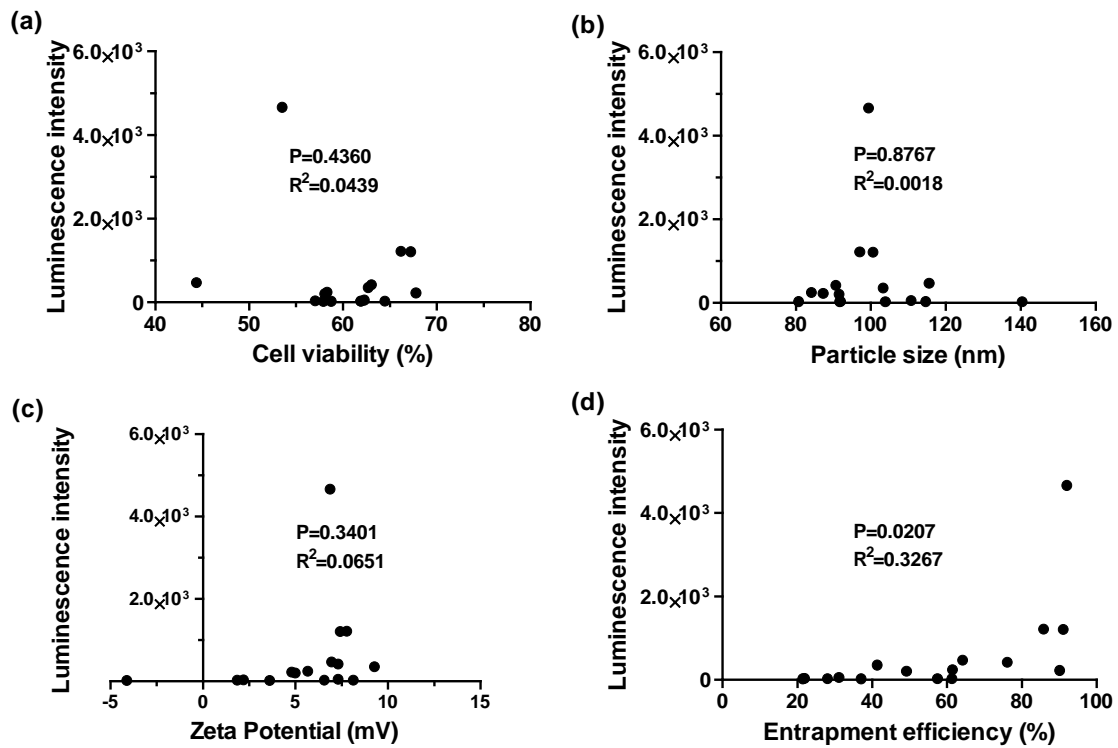

**Figure S4.** The correlation between transfection efficiency of TT3-DOPE LLNs formulated through the first orthogonal array and corresponding cell viability, particle size, zeta potential, and entrapment efficiency.



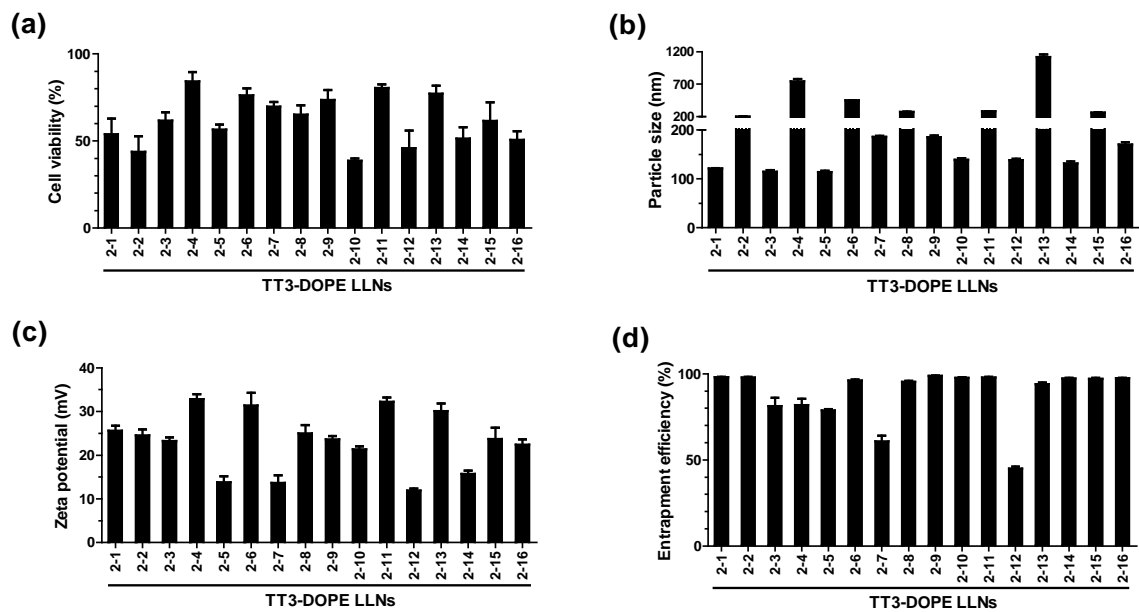

**Figure S5.** The cell viability (a), particle size (b), zeta potential (c), and entrapment efficiency (d) of TT3-DOPE LLNs formulated through the second round of orthogonal array.

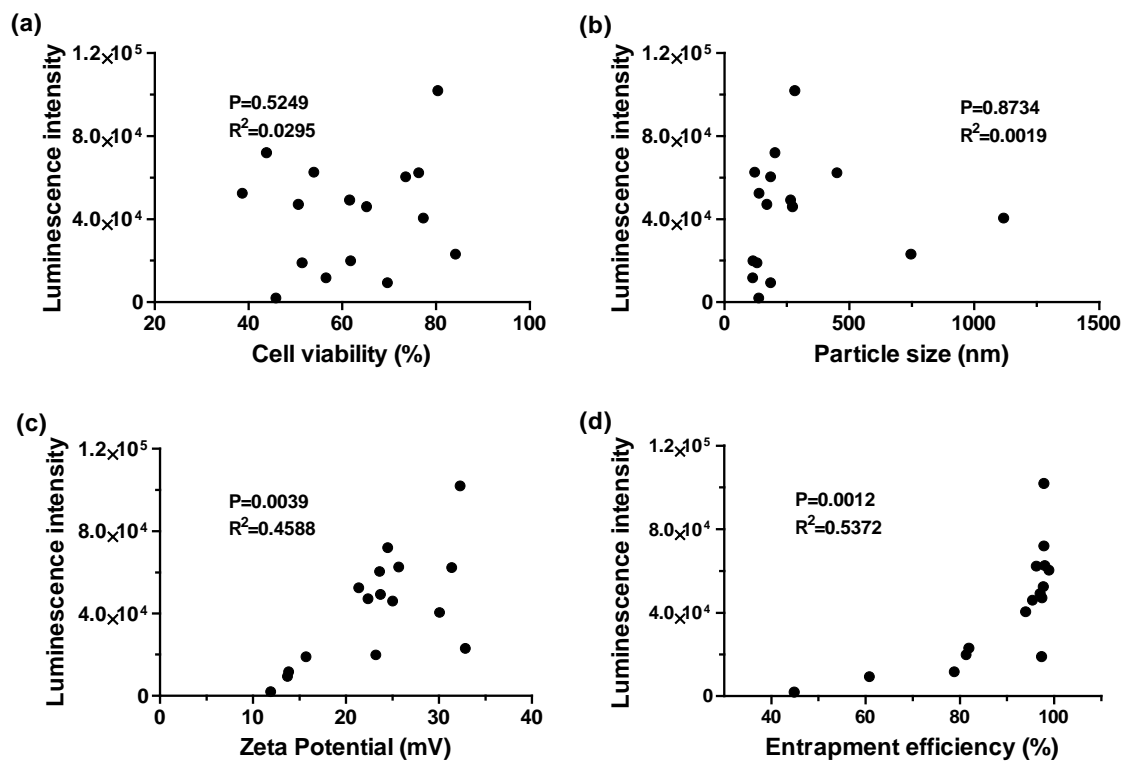

**Figure S6.** The correlation between transfection efficiency of TT3-DOPE LLNs formulated through the second round of orthogonal array and their corresponding cell viability, particle size, zeta potential, and entrapment efficiency.

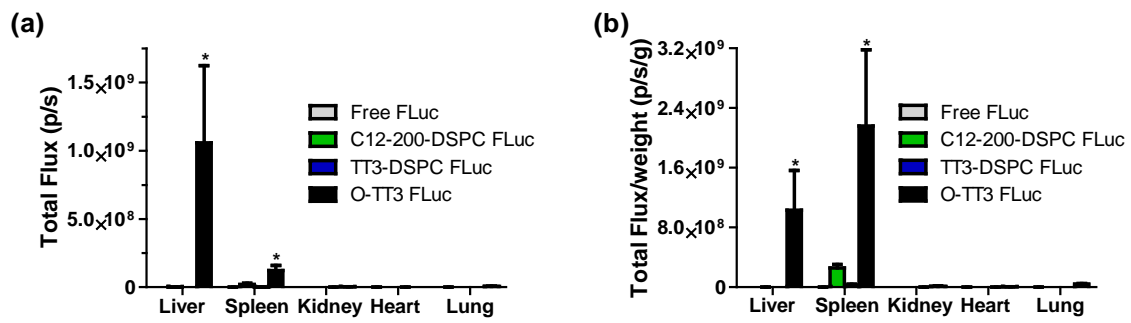

**Figure S7.** Bioluminescence signal (6 hours after administration in C57BL/6 mice). Free FLuc mRNA served as a negative control. Total bioluminescence signal (a) and normalized bioluminescence signal with tissue weight (b). Statistically significant difference was observed in the groups (\*:  $P < 0.05$ ; O-TT3 FLuc vs C12-200-DSPC FLuc; O-TT3 FLuc vs TT3-DSPC FLuc).

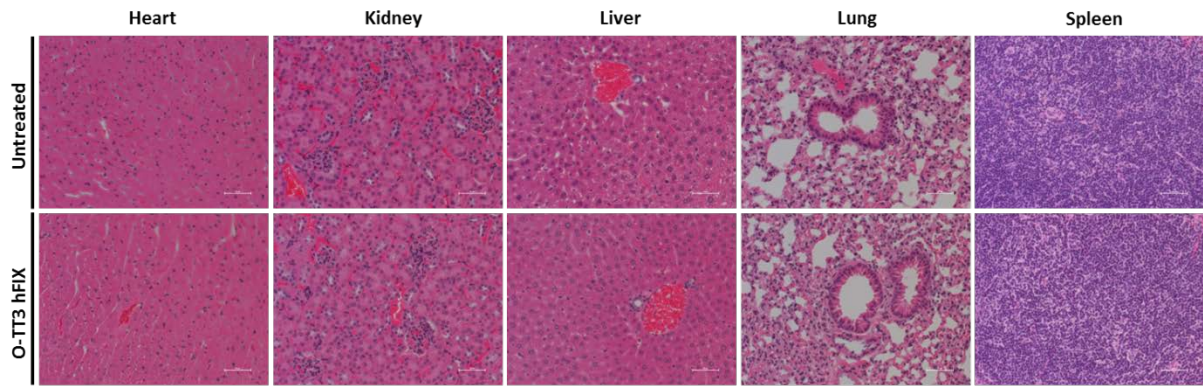

**Figure S8.** Histological analysis of major organs (heart, kidney, liver, lung, and spleen) after treatment of **O-TT3** hFIX. Untreated groups served as negative controls. No significant alteration of histology was observed in the **O-TT3** LLNs treated groups compared to the control groups.

**Table S1.** Orthogonal array table  $L_{16}(4^4)$  (a) and  $K_n$  values (b) for the first round of **TT3**-DOPE LLNs.

(a) Orthogonal array table  $L_{16}(4^4)$

| TT3-DOPE LLNs | Formulation components (mole ratio) |      |             |                         | Relative luminescence intensity |
|---------------|-------------------------------------|------|-------------|-------------------------|---------------------------------|
|               | TT3                                 | DOPE | Cholesterol | DMG-PEG <sub>2000</sub> |                                 |
| 1-1           | 30                                  | 2.5  | 38.5        | 3                       | 1216                            |
| 1-2           | 40                                  | 10   | 18.5        | 1.5                     | 351                             |
| 1-3           | 50                                  | 10   | 38.5        | 6                       | 418                             |
| 1-4           | 60                                  | 2.5  | 18.5        | 0.75                    | 20                              |
| 1-5           | 30                                  | 5    | 18.5        | 6                       | 28                              |
| 1-6           | 40                                  | 1.25 | 38.5        | 0.75                    | 28                              |
| 1-7           | 50                                  | 1.25 | 18.5        | 3                       | 34                              |
| 1-8           | 60                                  | 5    | 38.5        | 1.5                     | 51                              |
| 1-9           | 30                                  | 1.25 | 48.5        | 1.5                     | 1207                            |
| 1-10          | 40                                  | 5    | 28.5        | 3                       | 203                             |
| 1-11          | 50                                  | 5    | 48.5        | 0.75                    | 469                             |
| 1-12          | 60                                  | 1.25 | 28.5        | 6                       | 30                              |
| 1-13          | 30                                  | 10   | 28.5        | 0.75                    | 4663                            |
| 1-14          | 40                                  | 2.5  | 48.5        | 6                       | 220                             |
| 1-15          | 50                                  | 2.5  | 28.5        | 1.5                     | 20                              |
| 1-16          | 60                                  | 10   | 48.5        | 3                       | 243                             |

(b)  $K_n$  values

|                 | TT3         | DOPE        | Cholesterol | DMG-PEG <sub>2000</sub> |
|-----------------|-------------|-------------|-------------|-------------------------|
| $K_1^*$         | <b>1779</b> | 325         | 108         | <b>1295</b>             |
| $K_2^*$         | 201         | 369         | <b>1229</b> | 407                     |
| $K_3^*$         | 235         | 188         | 428         | 424                     |
| $K_4^*$         | 86          | <b>1419</b> | 535         | 174                     |
| $\Delta K^{**}$ | 1693        | 1231        | 1121        | 1121                    |

$$K_n^* = \Sigma RLI_n/4$$

$$\Delta K^{**} = K_{\max} - K_{\min}$$

The impact of the four components on mRNA delivery ( $\Delta K$ ): **TT3** > DOPE > Cholesterol = DMG-PEG<sub>2000</sub>.

**Table S2.** Orthogonal array table  $L_{16}(4^4)$  (a) and  $K_n$  values (b) for the second round of **TT3**-DOPE LLNs.

(a) Orthogonal array table  $L_{16}(4^4)$

| TT3-DOPE LLNs | Formulation components (mole ratio) |      |             |                         | Relative luminescence intensity |
|---------------|-------------------------------------|------|-------------|-------------------------|---------------------------------|
|               | TT3                                 | DOPE | Cholesterol | DMG-PEG <sub>2000</sub> |                                 |
| 2-1           | 10                                  | 20   | 35          | 0.15                    | 62542                           |
| 2-2           | 20                                  | 40   | 25          | 0.03                    | 71935                           |
| 2-3           | 30                                  | 40   | 35          | 0.75                    | 19869                           |
| 2-4           | 40                                  | 20   | 25          | 0                       | 23096                           |
| 2-5           | 10                                  | 30   | 25          | 0.75                    | 11687                           |
| 2-6           | 20                                  | 10   | 35          | 0                       | 62216                           |
| 2-7           | 30                                  | 10   | 25          | 0.15                    | 9394                            |
| 2-8           | 40                                  | 30   | 35          | 0.03                    | 45962                           |
| 2-9           | 10                                  | 10   | 40          | 0.03                    | 60333                           |
| 2-10          | 20                                  | 30   | 30          | 0.15                    | 52468                           |
| 2-11          | 30                                  | 30   | 40          | 0                       | 101863                          |
| 2-12          | 40                                  | 10   | 30          | 0.75                    | 1917                            |
| 2-13          | 10                                  | 40   | 30          | 0                       | 40410                           |
| 2-14          | 20                                  | 20   | 40          | 0.75                    | 18962                           |
| 2-15          | 30                                  | 20   | 30          | 0.03                    | 49102                           |
| 2-16          | 40                                  | 40   | 40          | 0.15                    | 47049                           |

(b)  $K_n$  values

|                 | TT3          | DOPE         | Cholesterol  | DMG-PEG <sub>2000</sub> |
|-----------------|--------------|--------------|--------------|-------------------------|
| $K_1^*$         | 43743        | 33465        | 29028        | <b>56896</b>            |
| $K_2^*$         | <b>51395</b> | 38426        | 35974        | 56833                   |
| $K_3^*$         | 45057        | <b>52995</b> | 47647        | 42863                   |
| $K_4^*$         | 29506        | 44816        | <b>57052</b> | 13109                   |
| $\Delta K^{**}$ | 21889        | 19529        | 18025        | 43788                   |

$$K_n^* = \Sigma RLI_n/4$$

$$\Delta K^{**} = K_{\max} - K_{\min}$$

The most efficient formulation in the second round of optimization was validated with a designated code of **Hi-TT3** LLNs (formulation ratio is **TT3**/DOPE/Chol/DMG-PEG<sub>2000</sub>=20/30/40/0).

## References

1. Matsuura, K.; Murasato, K.; Kimizuka, N. *J. Am. Chem. Soc.* **2005**, *127*, 10148-10149.
